# Supplementary material for: Does pruning affect the structural and ecological productivity of Juniper woodlands in the eastern Hindu Kush?
Source: PeerJ. 2025 Jun 17;13:e19184. doi: 10.7717/peerj.19184 (PMC12180449; doi:10.7717/peerj.19184)
Supplement: Supplemental Information 2 [file peerj-13-19184-s002.xlsx]

## Sheet: NPS
DBH (cm)	DRC (cm)	Height (m)	Cones (numbers tree-1)	Filled seeds (cone-1)	Age (years)	GR (cm year-1)	Volume (m3)
19.09	23.2262	1.82927	89		56	0.0767857	0.0469901
6.99968	11.7722	2.13415	172		60	0.0616667	0.00671639
21.9535	28.9532	6.09756	89		69	0.147826	0.11707
19.7264	24.4989	6.70732	91		63	0.15873	0.100857
22.2717	26.4079	6.70732	115		73	0.150685	0.128564
13.6812	18.1355	3.35366	78		73	0.0986301	0.0317529
9.86319	13.363	2.13415	119		74	0.0702703	0.0133356
11.1359	15.5902	2.7439	123	2	110	0.0654545	0.019018
17.8174	20.6809	5.18293	90	1	74	0.121622	0.0693597
15.9084	21.3172	6.09756	111		69	0.130435	0.0614734
14.3175	16.8629	2.13415	113		55	0.0963636	0.0281006
13.5221	18.4537	1.82927	90		47	0.157447	0.0235766
14.3175	17.181	2.7439	89		42	0.133333	0.031438
13.5221	17.181	2.7439	49		58	0.103448	0.0280419
15.1129	20.0445	2.13415	134	3	41	0.1	0.0313096
15.1129	21.9535	3.04878	123	1	43	0.0906977	0.0368874
8.59052	12.0904	2.13415	89	1	40	0.1	0.0101162
9.54502	12.4085	3.04878	79	1	50	0.118	0.0147141
14.3175	19.4082	2.13415	90	2	63	0.0746032	0.0281006
8.7496	11.7722	2.7439	116		44	0.0886364	0.0117407
5.72701	6.68151	3.35366	49		46	0.130435	0.00556405
11.9313	14.6357	3.04878	112	3	57	0.0982456	0.0229907
23.0671	26.4079	3.96341	100		56	0.1875	0.0989284
22.2717	26.7261	4.57317	63		60	0.15	0.100299
19.09	23.8626	4.87805	89		63	0.130159	0.0766556
22.2717	28.3169	4.26829	135		52	0.173077	0.0962611
21.4763	24.1807	4.26829	70		46	0.245652	0.0895081
21.4763	28.3169	3.96341	76		55	0.181818	0.0857536
16.7038	20.6809	3.65854	117		63	0.125397	0.0496044
23.8626	31.4986	6.40244	117		75	0.133333	0.14295
17.4992	21.3172	2.43902	109		64	0.125	0.0444702
25.4534	31.1804	7.0122	83		110	0.104545	0.173194
13.5221	17.8174	3.35366	89		67	0.0746269	0.0310187
29.9077	48.9978	7.62195	113		80	0.1625	0.253678
16.7038	21.6354	6.40244	92		69	0.1	0.0700457
10.1814	14.3175	7.0122	187		82	0.154878	0.027711
22.2717	26.7261	5.79268	231		65	0.14	0.11645
26.2488	28.9532	6.40244	123		129	0.0953488	0.17297
14.3175	16.8629	4.26829	59		45	0.122222	0.0397814
16.7038	19.09	5.4878	98		72	0.129167	0.0632319
22.2717	26.4079	6.09756	149		69	0.152174	0.120488
23.8626	28.3169	4.26829	188		71	0.119718	0.110504
23.8626	26.0897	5.79268	89		48	0.15625	0.13368
23.8626	27.3624	5.79268	78		61	0.106557	0.13368
19.09	23.2262	3.35366	93		64	0.125	0.0618228
19.09	21.3172	3.35366	99	1	80	0.14	0.0618228
19.09	23.2262	4.87805	98		71	0.0985915	0.0766556
24.658	26.0897	2.7439	66	2	64	0.109375	0.0932466
19.09	22.5899	3.04878	115	1	54	0.124074	0.0588563
28.6351	35.3166	7.0122	78		79	0.139241	0.219198
23.0671	26.4079	4.87805	118		79	0.126582	0.111922
24.658	27.6806	7.62195	65		67	0.138806	0.172437
13.0449	18.1355	7.92683	80		98	0.204082	0.049646
23.8626	27.9987	6.70732	62		86	0.122093	0.147586
25.4534	29.5896	8.84146	47		93	0.124731	0.204837
2.54534	20.6809	11.2805	55		51	0.0980392	0.00247028
24.658	28.9532	6.09756	80		61	0.163934	0.14769
19.09	24.4989	2.43902	96	1	44	0.186364	0.0529232
19.09	21.9535	2.7439	74	2	58	0.163793	0.0558897
19.09	22.908	5.79268	75.5	1	47	0.140426	0.0855552
19.7264	25.7716	4.57317	112	2	64	0.145313	0.0786835
22.2717	28.3169	5.4878	78	2	61	0.147541	0.112412
18.2946	21.9535	7.92683	93	2	91	0.118681	0.0976455
21.4763	24.4989	4.87805	59	2	68	0.177941	0.0970172
24.658	27.6806	8.53659	88	1	88	0.118182	0.187285
24.8171	31.1804	5.79268	117	1	87	0.149425	0.144588
26.2488	31.1804	7.0122	154	2	71	0.150704	0.184187
25.4534	29.5896	5.79268	80	1	62	0.137097	0.152098
15.1129	21.3172	3.35366	98		60	0.106667	0.0387466
19.09	22.5899	5.18293	114		75	0.12	0.0796221
33.4076	37.5437	6.40244	131	2	59	0.191525	0.280183

## Sheet: MPS
DBH (cm)	DRC (cm)	Height (m)	Cones (numbers tree-1)	Filled seeds (cone-1)	Age (years)	GR (cm year-1)	Volume (m3)
22.908	25.1352	4.87805	149		25	0.6	0.110384
14.6357	23.5444	5.4878			22	0.545455	0.0485438
16.2265	29.9077	6.09756	49		47	0.43617	0.063957
21.9535	27.6806	5.79268	114		25	0.88	0.113147
17.181	20.0445	6.09756	41		19	0.736842	0.0717026
18.7719	27.6806	5.4878			38	0.526316	0.0798586
12.4085	12.7267	6.09756			20	0.415	0.0374004
26.4079	31.8167	8.23171			33	0.575758	0.209134
17.181	26.7261	7.92683			26	0.634615	0.08612
19.4082	23.5444	5.79268	37		40	0.4	0.0884308
21.6354	22.5899	7.92683			24	0.666667	0.136563
15.9084	18.4537	5.4878			25	0.92	0.0573532
20.0445	25.4534	6.70732	96		46	0.347826	0.104136
25.7716	20.6809	8.23171			31	0.548387	0.199177
10.1814	13.363	3.96341			33	0.515152	0.0192728
7.31785	11.7722	2.7439	31		21	0.380952	0.00821269
14.6357	19.09	4.57317	110	2	32	0.453125	0.0433128
19.7264	23.2262	4.26829	56	3	28	0.607143	0.0755159
22.908	31.1804	5.79268	91	2	28	0.571429	0.123199
30.2259	38.1801	9.45122			39	0.435897	0.303726
16.5447	21.9535	5.79268			29	0.586207	0.0642615
34.6802	41.9981	11.8902			28	0.821429	0.478164
17.4992	20.0445	6.40244	110		33	0.69697	0.0768756
24.4989	31.8167	8.23171	64		55	0.418182	0.179991
20.6809	32.1349	6.40244	133		47	0.425532	0.107372
24.1807	30.2259	7.62195	46		41	0.365854	0.046835
12.4085	15.9084	5.4878			38	0.526316	0.0348937
16.8629	23.5444	6.40244	48		41	0.390244	0.0713863
21.9535	25.4534	0.609756			17	0.823529	0.0464514
31.8167	38.4983	9.45122	48		39	0.512821	0.336538
24.4989	31.8167	8.23171	64		55	0.418182	0.179991
30.2259	51.8613	7.0122	29		43	0.488372	0.24423
15.9084	23.2262	5.79268	25		21	0.619048	0.0594133
21.3172	26.4079	6.09756	28		39	0.487179	0.110382
16.5447	26.4079	4.26829	111		44	0.431818	0.0531204
17.181	23.5444	3.96341			29	0.5	0.0236446
16.5447	21.6354	5.18293	43		34	0.382353	0.059805
20.3627	28.9532	5.79268	76		36	0.472222	0.0973428
18.1355	23.8626	6.40244	0		34	0.470588	0.0263447
14.9539	23.2262	4.26829	89		27	0.444444	0.0433961
19.09	24.1807	5.4878	149		27	0.407407	0.0825887
16.5447	26.4079	4.26829	111		26	0.5	0.0531204
19.4082	25.1352	7.31707			28	0.428571	0.030172
14.6357	34.3621	5.4878	87	1	28	0.535714	0.0485438
18.1355	21.9535	8.53659	114	2	32	0.4375	0.101309
16.2265	21.3172	5.4878	118	2	30	0.4	0.0596703
12.0904	13.9994	2.7439	24	2	23	0.565217	0.022418
18.4537	21.9535	6.70732	43	3	29	0.534483	0.0882628
19.4082	20.999	5.4878	193	2	49	0.469388	0.0853646
25.4534	26.0897	6.40244	24		29	0.689655	0.162646

## Sheet: IPS
DBH (cm)	DRC (cm)	Height (m)	Cones (numbers tree-1)	Filled seeds (cone-1)	Age (years)	GR (cm year-1)	Volume (m3)
24.1807	26.4079	6.70732	41		51	0.343137	0.390292
17.181	25.7716	5.79268	24	3	48	0.270833	0.173393
19.09	22.5899	5.79268	141	2	41	0.341463	0.214066
14.6357	34.3621	5.4878	87	1	28	0.535714	0.120104
16.2265	24.1807	5.4878	24	3	41	0.341463	0.147633
14.3175	15.5902	4.87805	23	2	29	0.413793	0.103992
20.6809	31.1804	5.18293	54	1	41	0.439024	0.228391
20.0445	26.4079	7.31707			45	0.333333	0.289646
21.9535	24.1807	5.4878	113		48	0.3125	0.270234
15.5902	20.3627	3.65854	87		30	0.383333	0.0973433
14.6357	20.999	4.57317	110		52	0.25	0.102946
15.9084	22.2717	5.18293	83		42	0.333333	0.135143
15.9084	22.2717	5.18293	39		42	0.333333	0.135143
18.7719	22.5899	6.09756			51	0.294118	0.216399
20.999	26.7261	7.31707	14		38	0.342105	0.317888
13.6812	20.3627	3.35366	70		24	0.375	0.0699661
27.3624	28.3169	6.40244	150		44	0.363636	0.479767
14.6357	18.4537	5.79268	49		33	0.363636	0.125823
13.9994	17.181	3.96341	76		27	0.333333	0.0837236
15.5902	18.1355	5.18293	88		38	0.315789	0.129791
13.363	21.9535	7.0122	73		31	0.290323	0.123964
14.9539	21.9535	6.40244	39		43	0.302326	0.143294
20.999	26.7261	7.31707	86	3	38	0.342105	0.317888
13.9994	16.8629	6.40244	81	2	33	0.136364	0.125585
